# Supplementary figures and images for: Exploring the ultrafast dynamics of a diarylethene derivative using sub-10 fs laser pulses
Source: Royal Society of Chemistry journal article supplement (doi:10.1039/c8cp05882b), 2018-11-26

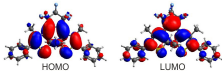

Supplement: c8cp05882b2.pdf [file c8cp05882b2.pdf]
